# Supplementary material
Source: Royal Society of Chemistry journal article supplement (doi:10.1039/d6dt00242k)
Supplement: d6dt00242k1.pdf [file d6dt00242k1.pdf]

## Supporting Information

### Interactions of IOX1, a histone demethylase inhibitor, with essential metal ions, albumin, and its clay-based nanoformulation

Hilda Kovács,<sup>a</sup> Orsolya Dömötör,<sup>a</sup> Anett Giricz,<sup>a</sup> Nóra Igaz,<sup>b</sup> Krisztina Szőke,<sup>b</sup> Csenge Bocz,<sup>b</sup> Mónika Kiricsi,<sup>b</sup> Adél Szerlauth,<sup>c</sup> Réka Ormos,<sup>c</sup> István Szilágyi,<sup>c</sup> Éva A. Enyedy<sup>a,\*</sup>

<sup>a</sup>H. Kovács, O. Dömötör, A. Giricz, É. A. Enyedy, Department of Molecular and Analytical Chemistry  
University of Szeged, Dóm tér 7-8, H-6720 Szeged, Hungary  
e-mail: enyedy@chem.u-szeged.hu

<sup>b</sup>N. Igaz, K. Szőke, C. Bocz, M. Kiricsi, Department of Biochemistry and Molecular Biology  
University of Szeged, Közép fasor 52, H-6726 Szeged, Hungary

<sup>c</sup>A. Szerlauth, R. Ormos, I. Szilágyi, MTA-SZTE „Momentum” Biocolloids Research Group, Department of  
Physical Chemistry and Materials Science, University of Szeged, Rerrich Béla tér 1, H-6720 Szeged,  
Hungary

---

#### Table of contents

|                                                                                                                                                |       |
|------------------------------------------------------------------------------------------------------------------------------------------------|-------|
| <sup>1</sup> H NMR spectra recorded for IOX1                                                                                                   | SI-2  |
| pK <sub>a</sub> values of 2-OG and overall stability constants (logβ) of Fe(III) and Fe(II) complexes                                          | SI-2  |
| UV-vis spectra recorded for 2-OG                                                                                                               | SI-2  |
| UV-vis spectra recorded for the Cu(II) – IOX1 (1:2) system                                                                                     | SI-3  |
| UV-vis spectra recorded for 2-OG – Fe(III) system                                                                                              | SI-3  |
| Cyclic voltammograms of the Fe(III) – 2-OG (1:3) system                                                                                        | SI-3  |
| ESI-MS spectrum of [RhCp*(LH)(H <sub>2</sub> O)] complex                                                                                       | SI-4  |
| <sup>1</sup> H NMR spectrum of [RhCp*(LH)Cl] complex in DMSO- <i>d</i> <sub>6</sub>                                                            | SI-4  |
| <sup>13</sup> C NMR spectrum of [RhCp*(LH)Cl] complex in DMSO- <i>d</i> <sub>6</sub>                                                           | SI-5  |
| UV-vis spectra of the isolated [RhCp*(LH)Cl] complex in PBS' at pH 7.4                                                                         | SI-5  |
| UV-vis spectra of [RhCp*(H <sub>2</sub> O) <sub>3</sub> ] <sup>2+</sup> – IOX1 (1:1) system in the pH range 2.3 – 11.3                         | SI-6  |
| UV-vis spectra of RhCp* – IOX1 – bpy system at various bpy-to-complex ratios                                                                   | SI-6  |
| UV-vis spectra of RhCp* – IOX1 complex measured at various chloride ion concentrations                                                         | SI-6  |
| Fluorescence spectra recorded for the HSA – WF and HSA – DG with IOX1                                                                          | SI-7  |
| Table of initial composition of the samples prepared for equilibrium dialysis experiments                                                      | SI-7  |
| Free and protein-bound fractions of IOX1, WF and DG determined in equilibrium dialysis assays                                                  | SI-8  |
| UV-vis spectra recorded for RhCp* – IOX1 complex with HSA and MIM                                                                              | SI-8  |
| UV-vis spectra recorded for the RhCp* complex of IOX1 with MIM                                                                                 | SI-8  |
| Primer crystallite size, hydrodynamic radius, polydispersity index, zeta potential and IOX1                                                    | SI-9  |
| TEM micrographs and size distribution diagrams of LDH and LDH/IOX1                                                                             | SI-9  |
| Solid-state UV-vis-diffuse reflectance (DRS) spectra of the LDH, IOX1, and LDH/IOX1                                                            | SI-10 |
| Viability of A549 cells upon IOX1, [RhCp*(LH)Cl], LDH, and LDH/IOX1 treatments                                                                 | SI-10 |
| The cytotoxicity of IOX1, [RhCp*(LH)Cl], LDH, and LDH/IOX1 treatments on A549 cells assessed by lactate dehydrogenase release                  | SI-10 |
| Viability of A549 cells upon IOX1, [RhCp*(LH)Cl], TTM, and deferiprone                                                                         | SI-11 |
| CI values calculated upon the IOX and TTM combinational treatments                                                                             | SI-11 |
| CI values calculated upon the [RhCp*(LH)Cl] and TTM combinational treatments                                                                   | SI-11 |
| CI values calculated upon the IOX1 and deferiprone combinational treatments                                                                    | SI-12 |
| CI values calculated upon the [RhCp*(LH)Cl] and deferiprone combinational treatments                                                           | SI-12 |
| Collection of hydrolysis constants of Fe(III) and Fe(II) measurements                                                                          | SI-12 |
| Concentration distribution curves for Fe(III) – IOX1 system                                                                                    | SI-13 |
| Conditions applied for steady-state spectrofluorometric measurements                                                                           | SI-13 |
| Spectral deconvolution of a HSA – IOX1 donor phase sample UV-vis spectrum and the donor and acceptor phases after equilibration of a WF sample | SI-14 |
| UV-vis spectra of IOX1 and LDH/IOX1 dissolved in HCl                                                                                           | SI-14 |
| References                                                                                                                                     | SI-14 |

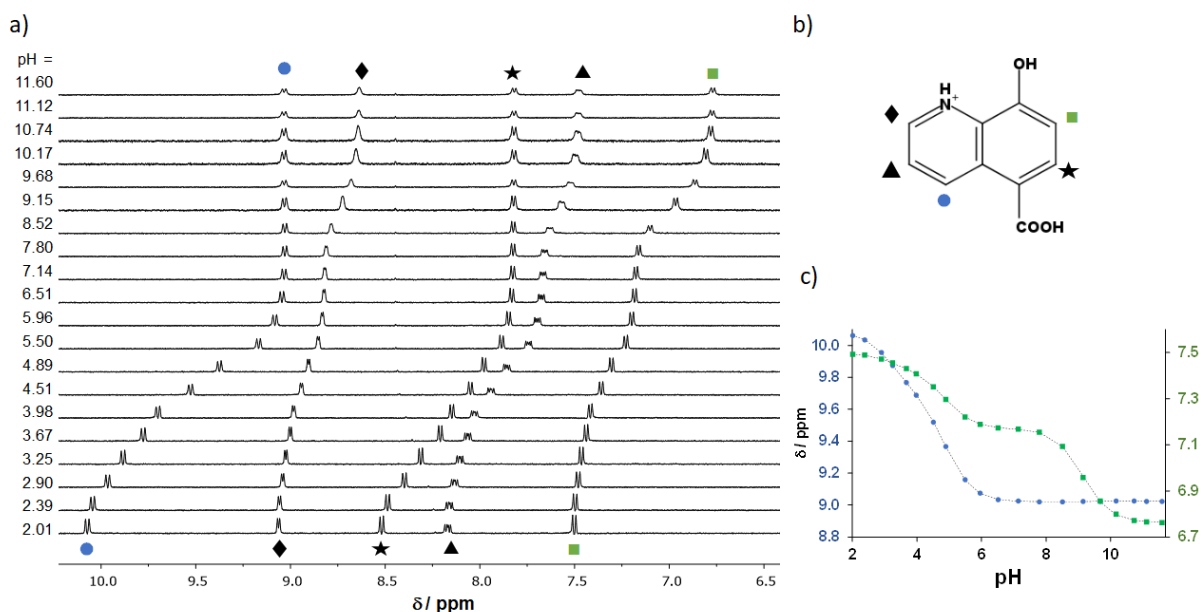

**Figure S1.** (a)  $^1\text{H}$  NMR spectra recorded for IOX1 in the pH range 2.0–11.6. (b) Chemical structure of the fully protonated ligand with the notation of the symbols of the CH protons. (c) Chemical shifts of two selected protons (C4H (●) & C7H (■) at various pH values with the fitted curve (dashed lines).  $\{c_{\text{IOX1}} = 700 \mu\text{M}; I = 0.2 \text{ M (KNO}_3\text{)}; 10\% \text{ (v/v) D}_2\text{O/H}_2\text{O}; T = 25.0 \text{ }^\circ\text{C}\}$

**Table S1.**  $pK_a$  values of 2-OG and overall stability constants ( $\log\beta$ ) of Fe(III) complexes determined by UV-vis spectrophotometric titrations, and  $\log\beta$  of Fe(II) complexes obtained by pH-potentiometry.<sup>[a]</sup>  $\{T = 25.0 \text{ }^\circ\text{C}; I = 0.1 \text{ M (KCl)}\}$

| $pK_a$             | 2-OG                    |                        |                         |
|--------------------|-------------------------|------------------------|-------------------------|
|                    | $pK_1 = 1.74 \pm 0.04$  | $pK_2 = 4.52 \pm 0.03$ |                         |
| $\log\beta$        | Fe(III)                 |                        | Fe(II)                  |
| method             | pH-metry <sup>[b]</sup> | UV-vis <sup>[c]</sup>  | pH-metry <sup>[d]</sup> |
| [MLH]              | –                       | $8.90 \pm 0.06$        | $7.06 \pm 0.09$         |
| [ML]               | 5.2                     | $5.89 \pm 0.09$        | –                       |
| [ML <sub>2</sub> ] | 8.2                     | $10.5 \pm 0.2$         | –                       |

[a] Charges of the complexes are omitted for clarity.  $\text{L}^{2-}$  is doubly negative. [b] Formation constants for Fe(III) complexes taken from Ref. S11 [c] Data were evaluated at  $\text{pH} < 4$ . [d] Data were evaluated at  $\text{pH} < 7$ .

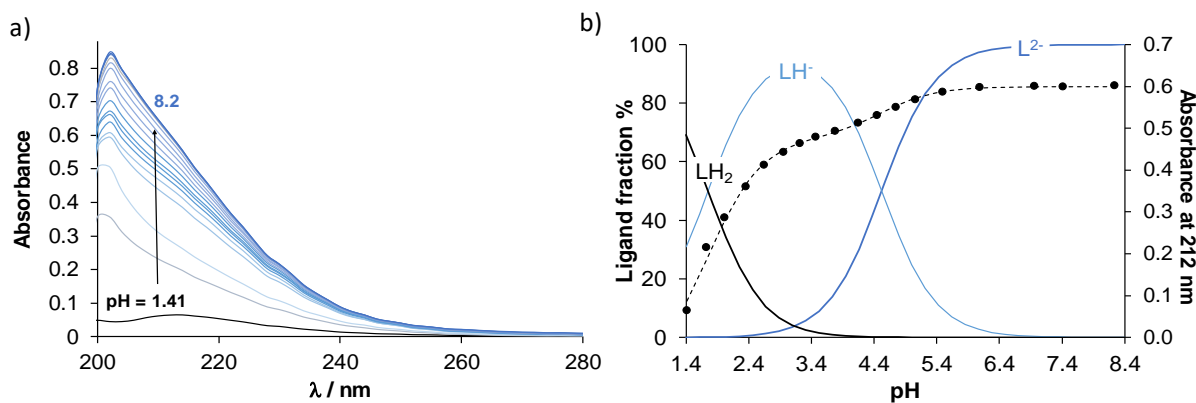

**Figure S2.** (a) UV-vis absorption spectra recorded for 2-OG in the pH range 1.4 – 8.2 (b) Concentration distribution curves calculated with the  $pK_a$  values obtained by UV-vis titrations, and absorbance changes at 212 nm (●) at various pH values with the fitted curve (dashed line).  $\{c_{\text{IOX1}} = 300 \mu\text{M}; \ell = 1 \text{ cm}; I = 0.1 \text{ M (KCl)}; T = 25.0 \text{ }^\circ\text{C}\}$

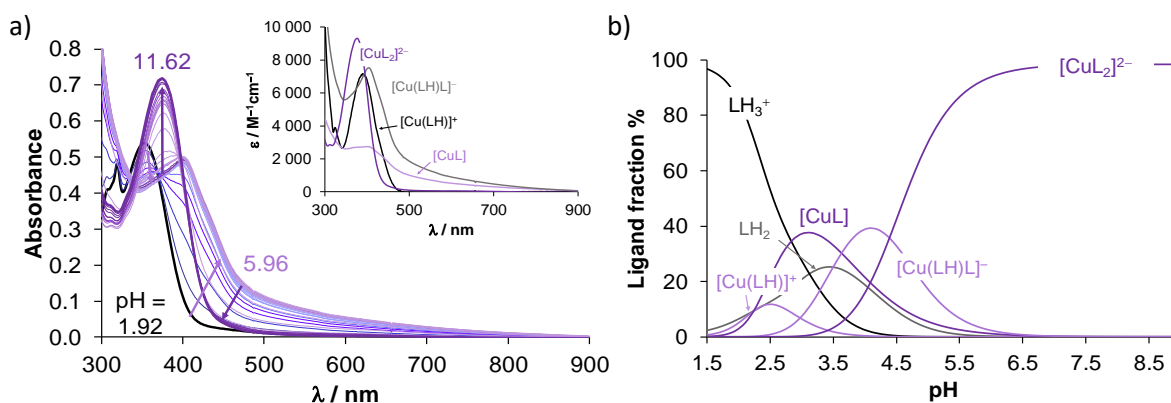

**Figure S3.** (a) UV-vis absorption spectra recorded for the Cu(II) – IOX1 (1:2) system in the pH range 2.1 – 11.6, the inserted figure shows the calculated UV-vis molar absorption spectra of the various complexes (b) Concentration distribution curves calculated for the same system.  $\{c_{\text{IOX1}} = 161 \mu\text{M}; c_{\text{Cu(II)}} = 80 \mu\text{M}; \ell = 1 \text{ cm}; I = 0.1 \text{ M (KCl)}; T = 25.0 \text{ }^\circ\text{C}\}$

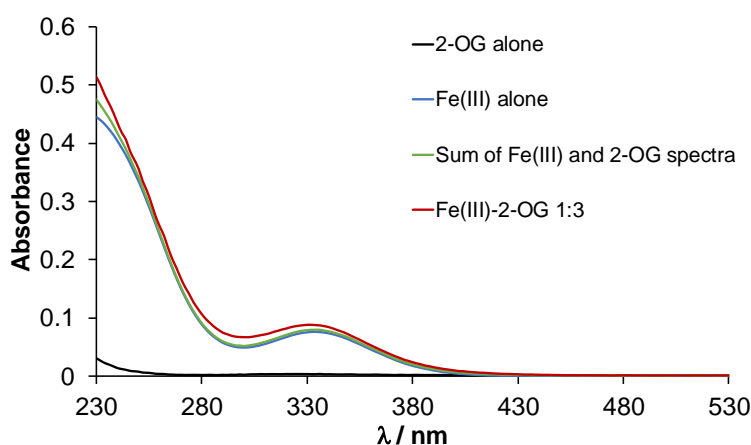

**Figure S4.** UV-vis absorption spectra recorded for 2-OG alone (black), Fe(III) alone (blue), sum of 2-OG and Fe(III) (green), and Fe(III) – 2-OG 1:3 system (red) at pH 1.40.  $\{c_{2\text{-OG}} = 300 \mu\text{M}; c_{\text{Fe(III)}} = 100 \mu\text{M}; \ell = 1 \text{ cm}; I = 0.1 \text{ M (KCl)}; T = 25.0 \text{ }^\circ\text{C}\}$

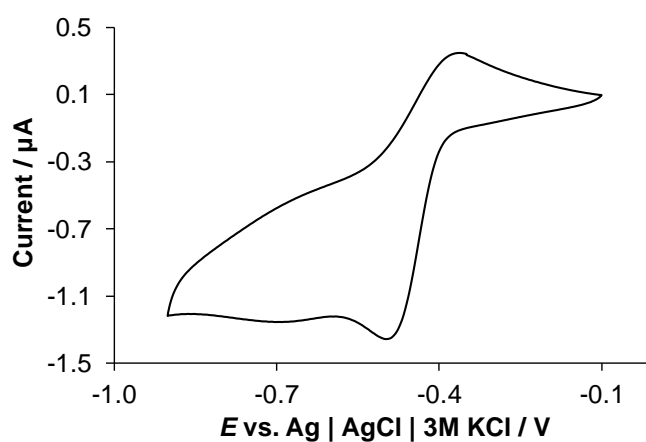

**Figure S5.** Cyclic voltammogram of the Fe(III) – 2-OG (1:3) system.  $\{c_{2\text{-OG}} = 1.5 \text{ mM}; c_{\text{Fe(III)}} = 0.5 \text{ mM}; \text{pH} = 3.00; 60\% \text{ (v/v) DMF/H}_2\text{O}; \text{scan rate: } 10 \text{ mV/s}; I = 0.1 \text{ M (KNO}_3\text{)}; T = 25.0 \text{ }^\circ\text{C}\}$

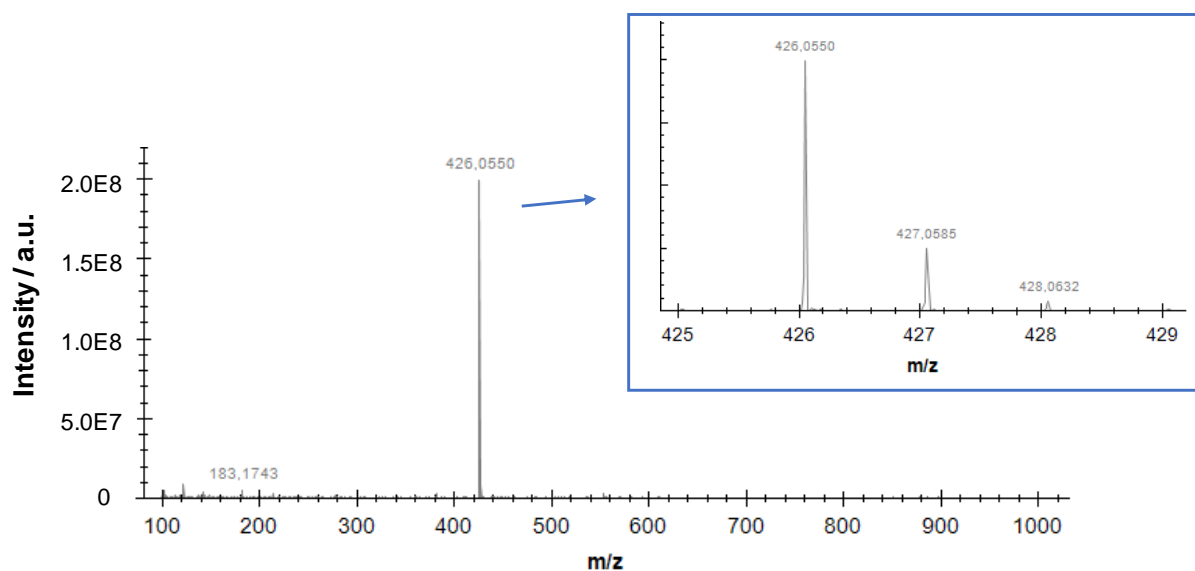

**Figure S6.** ESI-MS spectrum of  $[\text{RhCp}^*(\text{LH})(\text{H}_2\text{O})]$  complex,  $m/z$  values for  $[\text{RhCp}^*(\text{LH})]^+$  ( $\text{C}_{20}\text{H}_{21}\text{NO}_3\text{Rh}$ ): calculated: 426.0576, found: 426.0550.  $\{\text{C}_{\text{complex}} = 200 \mu\text{M}; \text{pH} = 7.4 (\text{NH}_4\text{HCO}_3)\}$

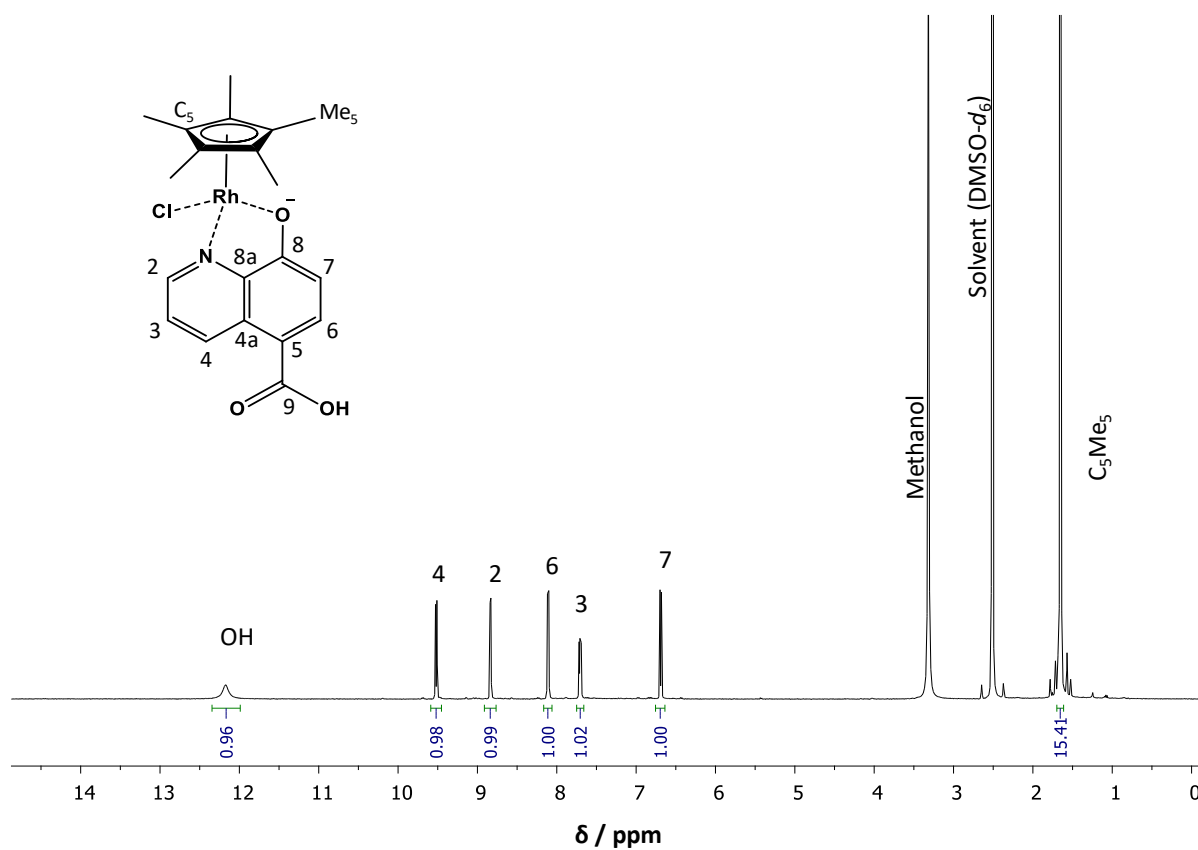

**Figure S7.**  $^1\text{H}$  NMR spectrum of  $[\text{RhCp}^*(\text{LH})\text{Cl}]$  complex in  $\text{DMSO-}d_6$ . Numbering in the chemical structure corresponds to the labeled NMR peaks.  $\{\text{C}_{\text{complex}} = 10 \text{ mM}, T = 25.0 \text{ }^\circ\text{C}\}$

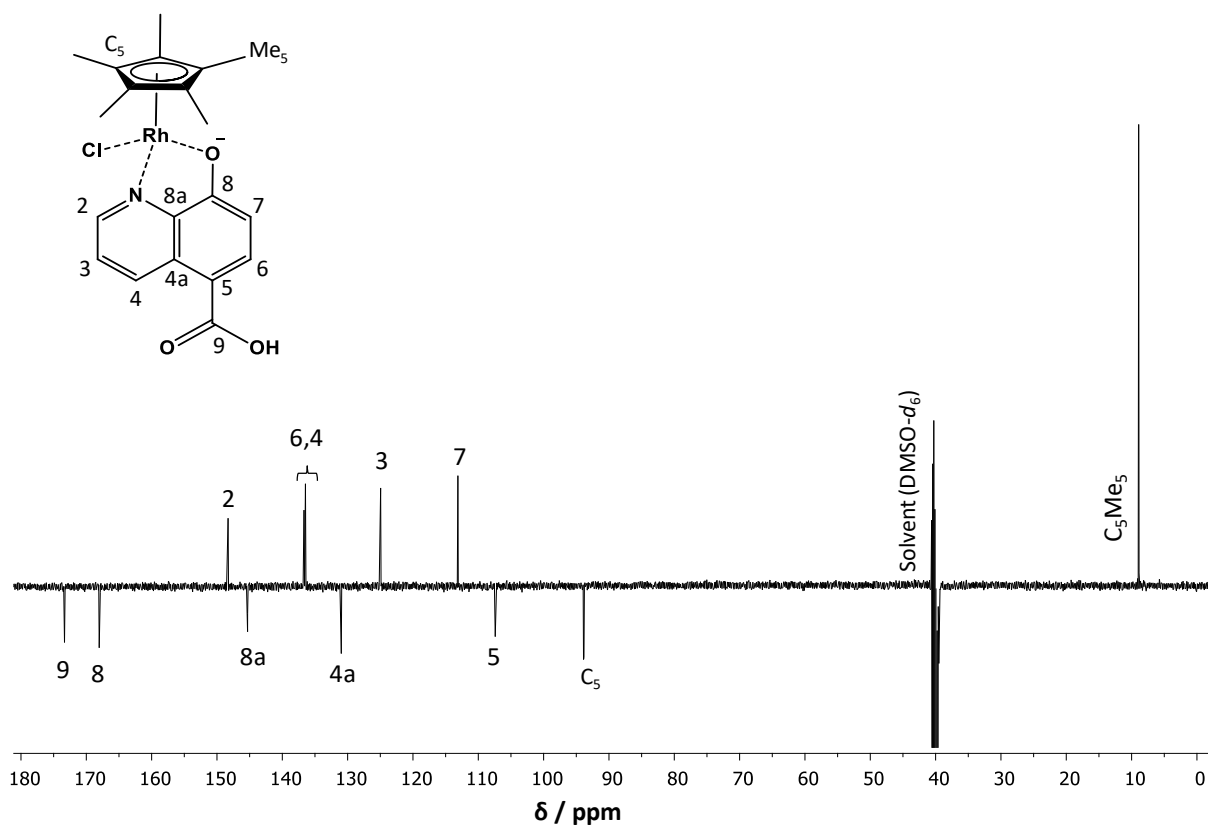

**Figure S8.**  $^{13}\text{C}$  APT NMR spectrum of  $[\text{RhCp}^*(\text{LH})\text{Cl}]$  complex in  $\text{DMSO-}d_6$ . Attached proton test method: CH and  $\text{CH}_3$  peaks are positive, C and  $\text{CH}_2$  peaks are negative. Numbering in the chemical structure corresponds to the labeled NMR peaks.  $\{c_{\text{Complex}} = 10 \text{ mM}, T = 25.0 \text{ }^\circ\text{C}\}$

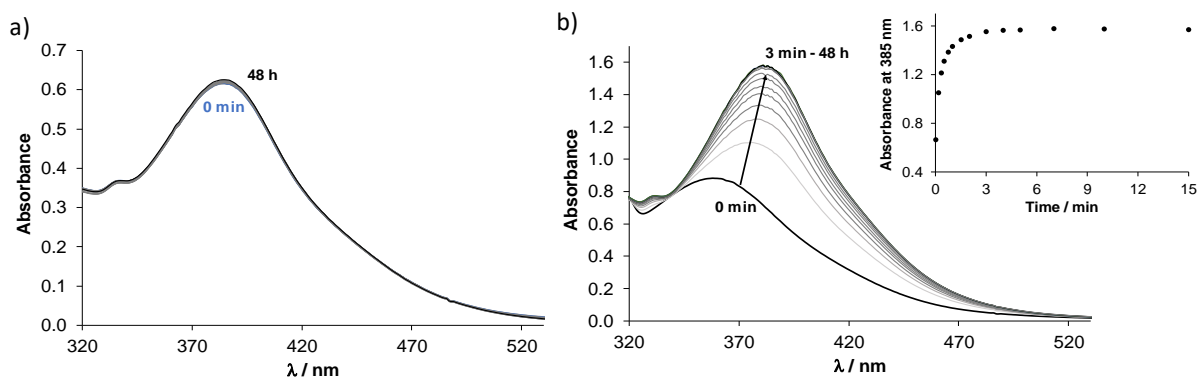

**Figure S9.** (a) UV-vis spectra of the isolated  $[\text{RhCp}^*(\text{LH})\text{Cl}]$  complex dissolved in  $\text{PBS}'$  at pH 7.4 recorded after 1 min (blue solid lines) and after 48 h (black solid lines), and (b) UV-vis spectra of  $[\text{RhCp}^*(\text{H}_2\text{O})_3]^{2+} - \text{IOX1}$  (1:1) chemical system at pH 2.00 (0.01M  $\text{KNO}_3$ ) at different time point.  $\{(a) c_{\text{Complex}} = 100 \text{ } \mu\text{M}; (b) c_{\text{RhCp}^*} = c_{\text{IOX1}} = 200 \text{ } \mu\text{M}; l = 0.2 \text{ M (KNO}_3); l = 1 \text{ cm}; T = 25.0 \text{ }^\circ\text{C}\}$

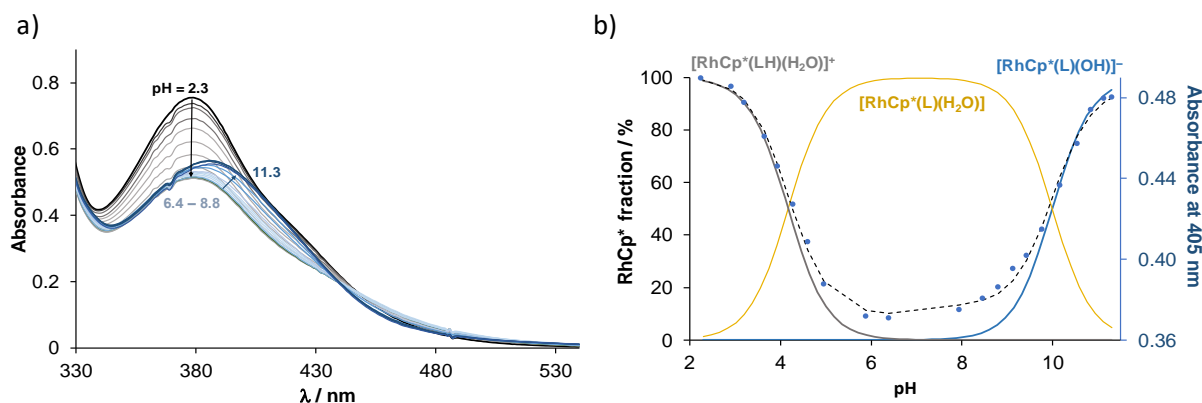

**Figure S10.** (a) UV-vis absorption spectra recorded for the [RhCp\*(H<sub>2</sub>O)<sub>3</sub>]<sup>2+</sup> – IOX1 (1:1) chemical system in the pH range 2.3 – 11.3. (b) Concentration distribution curves calculated for the same system based on the obtained pK<sub>a</sub> values, and absorbance values at 405 nm at various pH values with the fitted curve (dashed line). {c<sub>RhCp\*</sub> = c<sub>IOX1</sub> = 80 μM; ℓ = 1 cm; I = 0.2 M (KNO<sub>3</sub>); T = 25.0 °C}

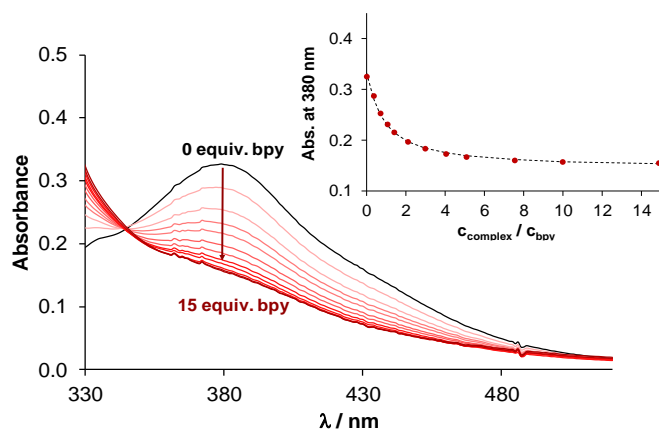

**Figure S11.** UV-vis spectra of RhCp\* – IOX1 – bpy system at various bpy-to-complex ratios, and the inserted figure shows the absorbance values at 380 nm at various ratios with the fitted curve (dashed line). {c<sub>RhCp\*</sub> = c<sub>IOX1</sub> = 50 μM; c<sub>bpy</sub> = 0 – 745 μM; ℓ = 1 cm; pH = 7.4 (20 mM phosphate buffer); I = 0.2 M (KNO<sub>3</sub>); T = 25.0 °C}

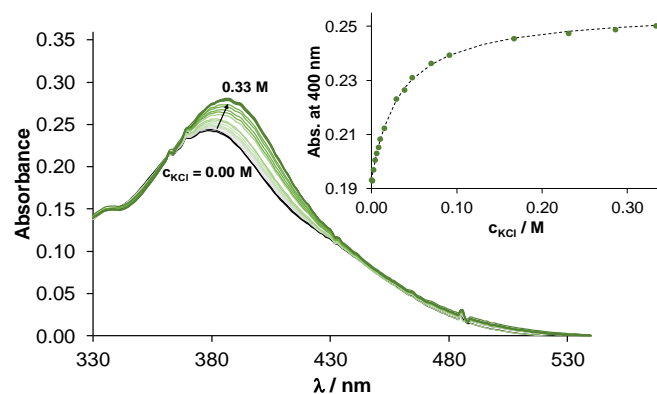

**Figure S12.** UV-vis spectra of RhCp\* – IOX1 complex at pH 7.40 measured at various chloride ion concentrations, and the inserted figure shows the absorbance values at 400 nm at various chloride ion concentrations with the fitted curve (dashed line). {c<sub>complex</sub> = 80 μM; c<sub>KCl</sub> = 0 – 0.33 M; ℓ = 1 cm; pH = 7.4 (20 mM phosphate buffer); T = 25.0 °C}

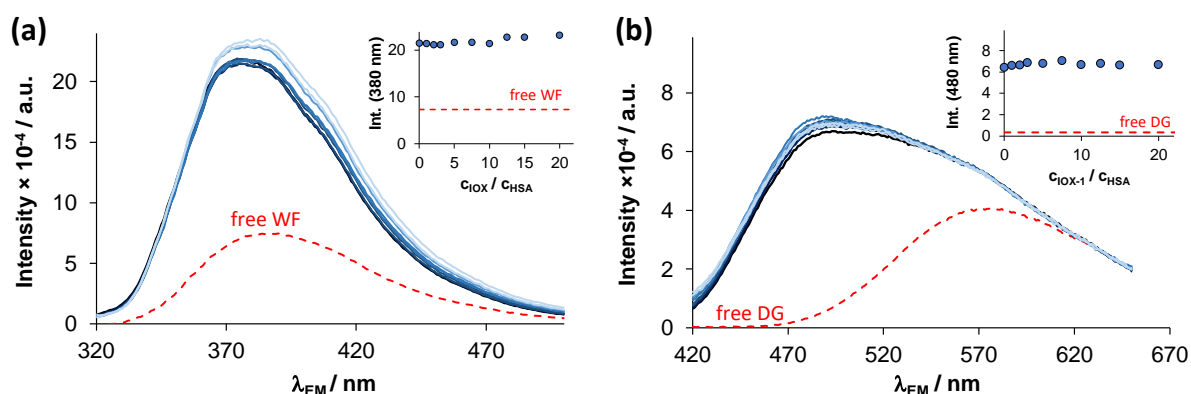

**Figure S13.** Fluorescence spectra recorded for the HSA – WF (a) and HSA – DG (b) systems in the presence of increasing IOX1 concentrations. The inserted figures show the intensities at the indicated  $\lambda_{EM}$  as a function of IOX1-to-HSA ratios. Dashed spectra denote the emission spectra of free site markers; IOX1 is non-fluorescent under the applied conditions.  $\{C_{HSA} = C_{site\ marker} = 1\ \mu\text{M}; C_{IOX1} = 0\text{--}20\ \mu\text{M}; \lambda_{EX} = 310\ \text{nm}\ (\text{WF}), 335\ \text{nm}\ (\text{DG}); \text{pH} = 7.40\ (\text{PBS}'\ \text{with}\ 2\ \text{mM}\ \text{EDTA}); T = 25\ ^\circ\text{C}\}$

**Table S2.** Initial composition of the samples prepared for equilibrium dialysis experiments, equilibrium concentrations, and free compound fractions obtained after the equilibrium was reached. UV-vis spectroscopy and Solver add-in of MS Excel were applied to determine free marker and IOX1 concentrations in the acceptor phase.  $\{\text{pH} = 7.40\ (\text{PBS}'\ \text{with}\ 2\ \text{mM}\ \text{EDTA}), T = 25\ ^\circ\text{C}\}$

|                                                                                                                                                | IOX1  | HSA – IOX1 | WF    | HSA – WF | HSA – WF – IOX1 | DG    | HSA – DG | HSA – DG – IOX1 |
|------------------------------------------------------------------------------------------------------------------------------------------------|-------|------------|-------|----------|-----------------|-------|----------|-----------------|
| <b>total concentrations in the donor phase prior to the dialysis (<math>\mu\text{M}</math>) <math>V_{donor} = 0.30\ \text{mL}</math></b>       |       |            |       |          |                 |       |          |                 |
| $C_{HSA}$                                                                                                                                      | 0     | 103        | 0     | 103      | 103             | 0     | 103      | 103             |
| $C_{marker}$                                                                                                                                   | 0     | 0          | 106   | 106      | 106             | 98    | 98       | 98              |
| $C_{IOX1}$                                                                                                                                     | 202   | 202        | 0     | 0        | 202             | 0     | 0        | 202             |
| <b>concentrations after equilibration in the acceptor phase (<math>\mu\text{M}</math>) <math>V_{acceptor} = 2.00\ \text{mL}</math></b>         |       |            |       |          |                 |       |          |                 |
| $[\text{marker}]_{acceptor}$                                                                                                                   | -     | -          | 13.6  | 6.8      | 7.9             | 13.1  | 8.2      | 9.2             |
| $[\text{IOX1}]_{acceptor}$                                                                                                                     | 25.2  | 20.1       | -     | -        | 20.5            | -     | -        | 21.8            |
| <b>concentrations after equilibration in the donor phase (<math>\mu\text{M}</math>) <math>V_{donor} = 0.30\ \text{mL}</math></b>               |       |            |       |          |                 |       |          |                 |
| $[\text{marker}]_{donor}$                                                                                                                      | -     | -          | 14.0* | 6.8      | 7.9             | 13.9* | 8.2      | 9.2             |
| $[\text{HSA-bound marker}]_{donor}$                                                                                                            | -     | -          | -     | 53.7     | 45.2            | -     | 35.7     | 35.1            |
| $[\text{IOX1}]_{donor}$                                                                                                                        | 26.2* | 20.1       | -     | -        | 20.5            | -     | -        | 21.8            |
| $[\text{HSA-bound IOX1}]_{donor}$                                                                                                              | -     | 46.4       | -     | -        | 44.4            | -     | -        | 34.8            |
| <b>free compound fraction (%) <math>([\text{compound}]_{donor} / ([\text{compound}]_{donor} + [\text{HSA-bound compound}]_{donor}))</math></b> |       |            |       |          |                 |       |          |                 |
| marker                                                                                                                                         |       | -          |       | 11       | 15              |       | 19       | 21              |
| IOX1                                                                                                                                           |       | 30         |       | -        | 32              |       | -        | 39              |

\* Based on the UV-vis spectrum measured in the donor phase after equilibration.

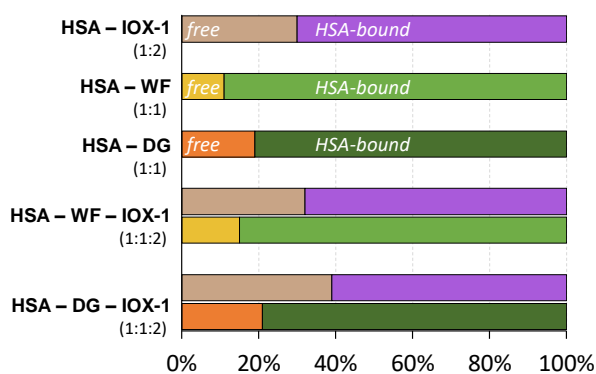

**Figure S14.** Free and protein-bound fractions of IOX1, WF, and DG in the indicated binary or ternary systems were determined in equilibrium dialysis assays.  $\{c_{\text{HSA}} = 100 \mu\text{M}; V_{\text{donor}} = 0.300 \text{ mL}, V_{\text{akceptor}} = 2.00 \text{ mL}; \text{pH} = 7.40 \text{ (PBS' with 2 mM EDTA)}; T = 25 \text{ }^\circ\text{C}\}$ . Note: the indicated concentration ratios apply to the initial sample composition, see details in Table S2.

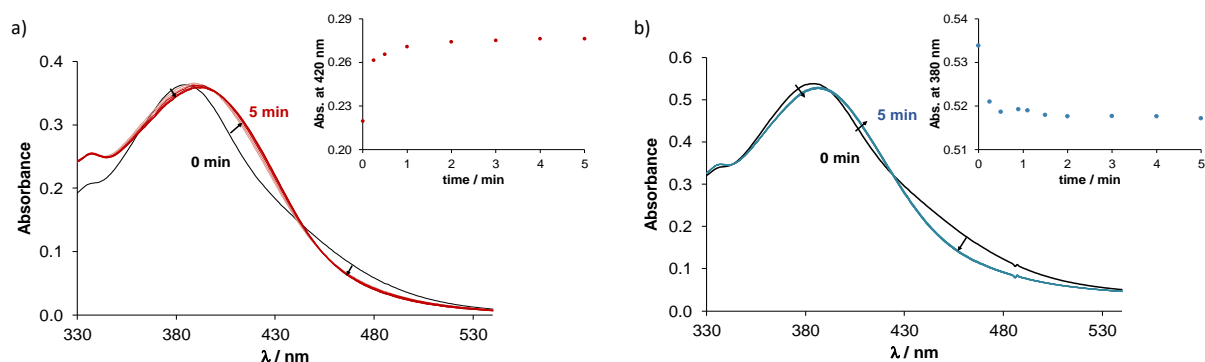

**Figure S15.** UV-vis spectra were recorded for RhCp\* – IOX1 complex at pH 7.40 upon addition of (a) half equivalent of HSA and (b) one equivalent of MIM. Insert figures show the absorbance values at (a) 380 and (b) 420 nm plotted against time.  $\{(a) c_{\text{complex}} = 50 \mu\text{M}; c_{\text{HSA}} = 25 \mu\text{M}; (b) c_{\text{complex}} = 75 \mu\text{M}; c_{\text{MIM}} = 75 \mu\text{M}; \ell = 1 \text{ cm}; \text{pH} = 7.40 \text{ (PBS')} ; T = 25.0 \text{ }^\circ\text{C}\}$

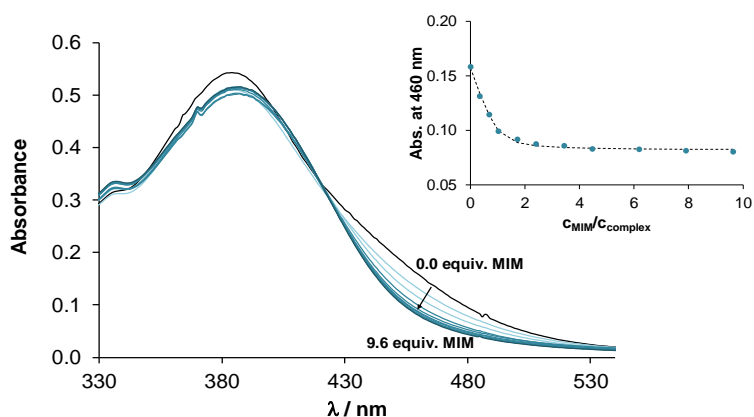

**Figure S16.** UV-vis spectra were recorded for the RhCp\* complex of IOX1 upon addition of MIM at pH 7.4, and the inserted figure shows the absorbance change at 460 nm at various chloride ion concentrations with the fitted curve (dashed line).  $\{c_{\text{complex}} = 75 \mu\text{M}; c_{\text{MIM}} = 0 - 722 \mu\text{M}; \ell = 1 \text{ cm}; \text{pH} = 7.4 \text{ (PBS')} ; T = 25.0 \text{ }^\circ\text{C}\}$

**Table S3.** Primer crystallite size, hydrodynamic radius ( $R_h$ ), polydispersity index (PDI), zeta potential, and IOX1 concentration of bare and IOX1-loaded LDH samples.

| sample   | primer crystallite size (nm) | $R_h$ (nm)     | PDI             | Zeta potential (mV) | $C_{IOX1}$ (mM) |
|----------|------------------------------|----------------|-----------------|---------------------|-----------------|
| LDH      | 24.8                         | $38.6 \pm 2.5$ | $0.21 \pm 0.01$ | $32.3 \pm 2.2$      | –               |
| LDH/IOX1 | 10.8                         | $58.4 \pm 10$  | $0.23 \pm 0.02$ | $26.5 \pm 0.8$      | $0.63 \pm 0.01$ |

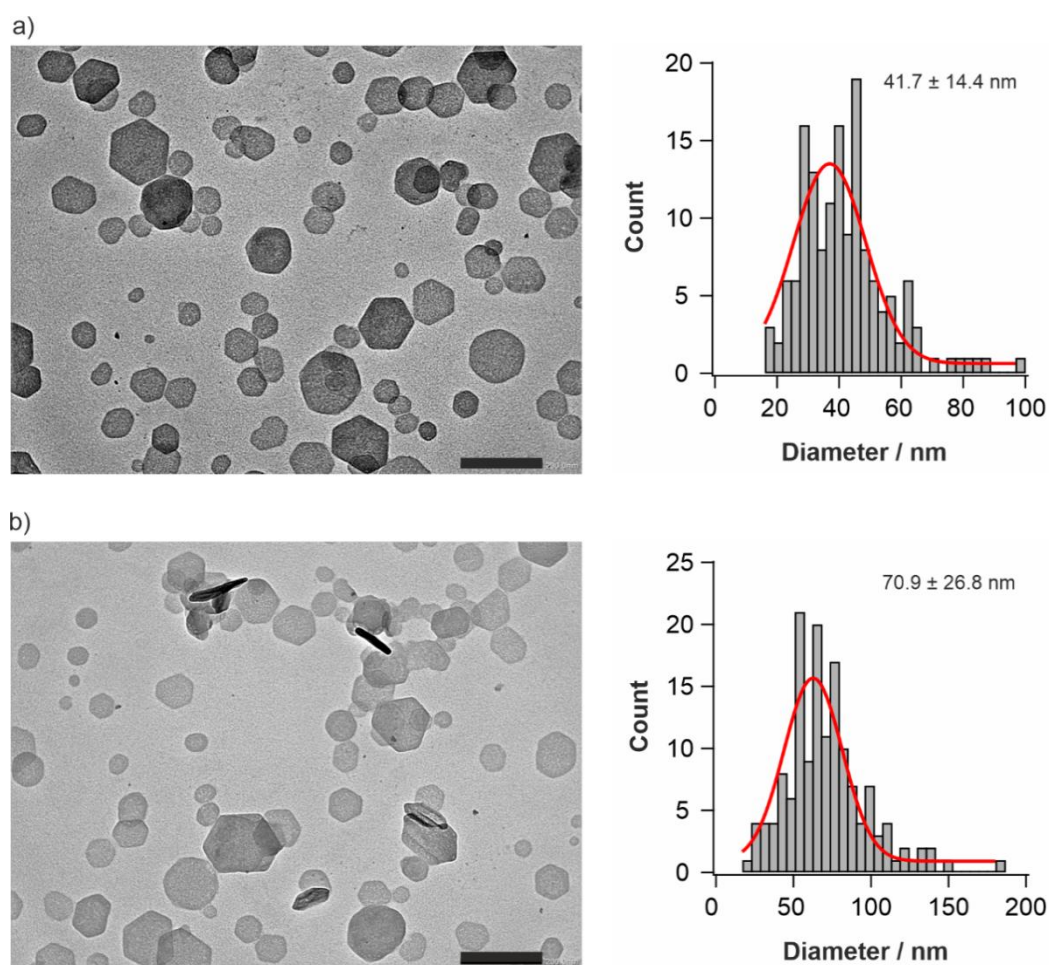

**Figure S17.** TEM micrographs and size distribution diagrams of (a) LDH and (b) LDH/IOX1. The average diameter with the standard deviation is indicated in the corner of each size distribution diagram. The scale bars represent 200 nm.

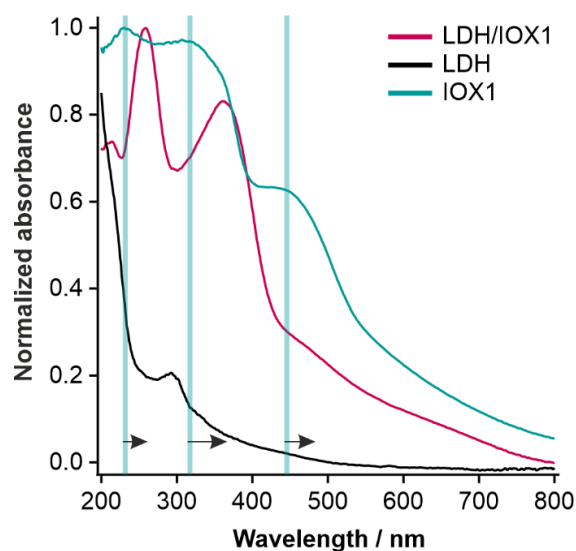

**Figure S18.** Solid-state UV-vis-diffuse reflectance (DRS) spectra of the LDH, IOX1, and LDH/IOX1 compounds.

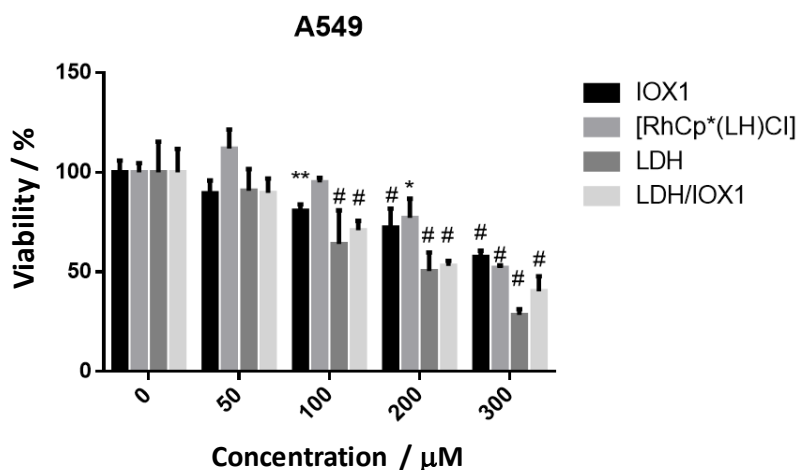

**Figure S19.** Viability of A549 cells upon IOX1, [RhCp\*(LH)Cl], LDH, and LDH/IOX1 treatments. Two-way ANOVA, Dunnett's multiple comparisons test, \*P < 0.05, \*\*P < 0.01, #P < 0.0001.

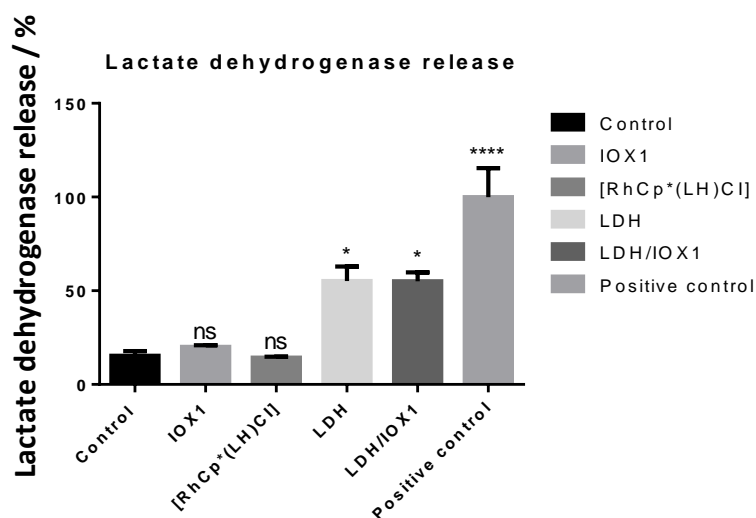

**Figure S20.** The cytotoxicity of IOX1, [RhCp\*(LH)Cl], LDH, and LDH/IOX1 treatments on A549 cells was assessed by lactate dehydrogenase assay. One-way ANOVA, Dunnett's multiple comparisons test, \*P < 0.05, \*\*\*\*P < 0.0001. Triton-X-100 was used as a positive control according to the manufacturer's instructions.

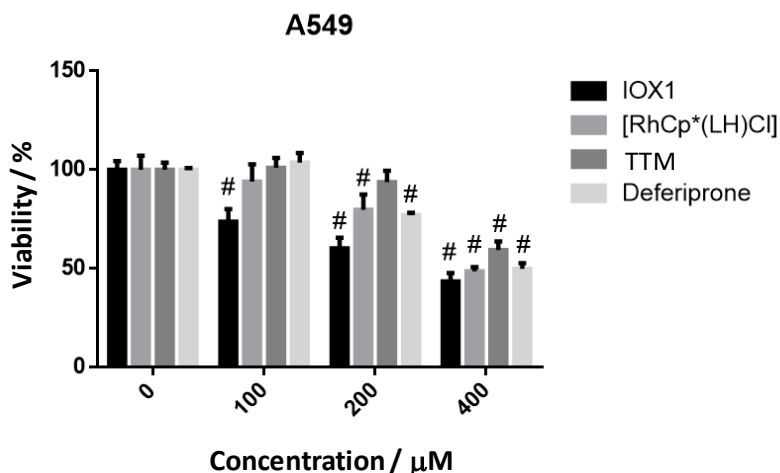

**Figure S21.** Viability of A549 cells upon individual IOX1, [RhCp\*(LH)Cl], TTM, and deferiprone treatments. Two-way ANOVA, Dunnett's multiple comparisons test, #P < 0.0001.

**Table S4.** CI values calculated upon the IOX and TTM combinational treatments.

| drug1 | drug2 | conc. (1) (μM) | conc. (2) (μM) | CI   | inhibition (%) |
|-------|-------|----------------|----------------|------|----------------|
| IOX1  | TTM   | 100            | 100            | 1.14 | 29             |
| IOX1  | TTM   | 200            | 100            | 1.07 | 45             |
| IOX1  | TTM   | 400            | 100            | 1.16 | 58             |
| IOX1  | TTM   | 100            | 200            | 1.44 | 29             |
| IOX1  | TTM   | 200            | 200            | 1.18 | 50             |
| IOX1  | TTM   | 400            | 200            | 1.19 | 64             |
| IOX1  | TTM   | 100            | 400            | 1.42 | 49             |
| IOX1  | TTM   | 200            | 400            | 1.51 | 57             |
| IOX1  | TTM   | 400            | 400            | 1.62 | 66             |

**Table S5.** CI values calculated upon the [RhCp\*(LH)Cl] and TTM combinational treatments.

| drug1         | drug2 | conc. (1) (μM) | conc. (2) (μM) | CI   | inhibition (%) |
|---------------|-------|----------------|----------------|------|----------------|
| [RhCp*(LH)Cl] | TTM   | 100            | 100            | 1.52 | 40             |
| [RhCp*(LH)Cl] | TTM   | 200            | 100            | 1.44 | 16             |
| [RhCp*(LH)Cl] | TTM   | 400            | 100            | 1.11 | 60             |
| [RhCp*(LH)Cl] | TTM   | 100            | 200            | 1.34 | 12             |
| [RhCp*(LH)Cl] | TTM   | 200            | 200            | 1.36 | 30             |
| [RhCp*(LH)Cl] | TTM   | 400            | 200            | 1.38 | 59             |
| [RhCp*(LH)Cl] | TTM   | 100            | 400            | 1.04 | 80             |
| [RhCp*(LH)Cl] | TTM   | 200            | 400            | 1.12 | 84             |
| [RhCp*(LH)Cl] | TTM   | 400            | 400            | 1.33 | 85             |

**Table S6.** CI values calculated upon the IOX1 and deferiprone combinational treatments.

| drug1 | drug2       | conc. (1)<br>( $\mu\text{M}$ ) | conc. (2)<br>( $\mu\text{M}$ ) | CI   | inhibition (%) |
|-------|-------------|--------------------------------|--------------------------------|------|----------------|
| IOX1  | deferiprone | 100                            | 100                            | 0.70 | 45             |
| IOX1  | deferiprone | 200                            | 100                            | 0.97 | 49             |
| IOX1  | deferiprone | 400                            | 100                            | 1.08 | 61             |
| IOX1  | deferiprone | 100                            | 200                            | 0.94 | 49             |
| IOX1  | deferiprone | 200                            | 200                            | 1.16 | 53             |
| IOX1  | deferiprone | 400                            | 200                            | 1.45 | 59             |
| IOX1  | deferiprone | 100                            | 400                            | 1.37 | 61             |
| IOX1  | deferiprone | 200                            | 400                            | 1.57 | 61             |
| IOX1  | deferiprone | 400                            | 400                            | 1.51 | 75             |

**Table S7.** CI values calculated upon the [RhCp\*(LH)Cl] and deferiprone combinational treatments.

| drug1         | drug2       | conc. (1)<br>( $\mu\text{M}$ ) | conc. (2)<br>( $\mu\text{M}$ ) | CI   | inhibition (%) |
|---------------|-------------|--------------------------------|--------------------------------|------|----------------|
| [RhCp*(LH)Cl] | deferiprone | 100                            | 100                            | 0.67 | 33             |
| [RhCp*(LH)Cl] | deferiprone | 200                            | 100                            | 0.79 | 52             |
| [RhCp*(LH)Cl] | deferiprone | 400                            | 100                            | 0.99 | 69             |
| [RhCp*(LH)Cl] | deferiprone | 100                            | 200                            | 0.90 | 44             |
| [RhCp*(LH)Cl] | deferiprone | 200                            | 200                            | 1.05 | 56             |
| [RhCp*(LH)Cl] | deferiprone | 400                            | 200                            | 1.35 | 65             |
| [RhCp*(LH)Cl] | deferiprone | 100                            | 400                            | 1.43 | 55             |
| [RhCp*(LH)Cl] | deferiprone | 200                            | 400                            | 1.59 | 61             |
| [RhCp*(LH)Cl] | deferiprone | 400                            | 400                            | 1.78 | 73             |

**Table S8.** Collection of hydrolysis constants of Fe(III) and Fe(II). <sup>a</sup> {I = 0; T = 25 °C}

| $\log\beta$                       | Fe(III) | Fe(II) |
|-----------------------------------|---------|--------|
| [MH <sub>-1</sub> ]               | -2.2    | -9.43  |
| [MH <sub>-2</sub> ]               | -5.71   | -20.73 |
| [MH <sub>-3</sub> ]               | -12.26  | -32.68 |
| [MH <sub>-4</sub> ]               | -21.6   | –      |
| [M <sub>2</sub> H <sub>-2</sub> ] | -2.91   | –      |

<sup>a</sup> Data taken from Ref. SI2.

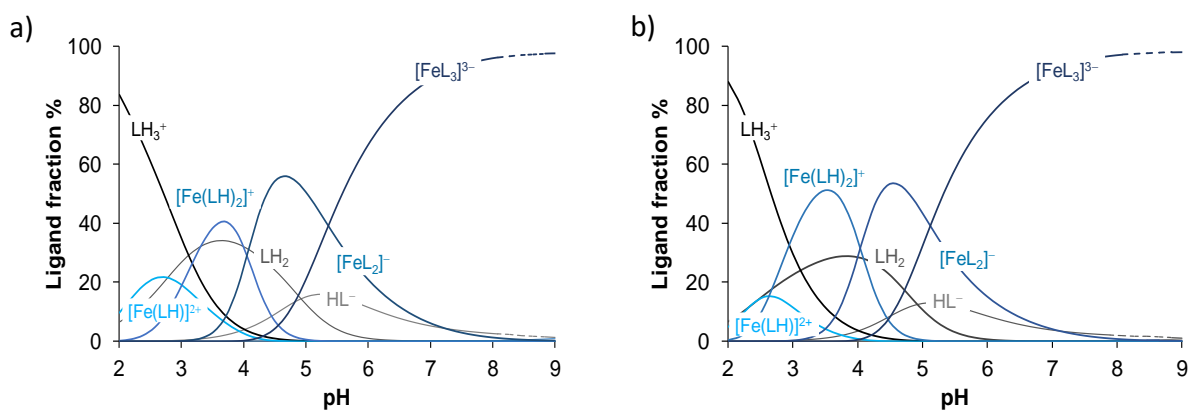

**Figure S22.** Concentration distribution curves calculated for Fe(III) – IOX1 (1:3) systems with hydrolysis constants for (a)  $I = 0.1$  KNO<sub>3</sub> ( $\log\beta$  for  $[MH_{-1}] = -2.56$ ,  $[MH_{-2}] = -5.9$ ,  $[M_2H_{-2}] = -2.88$ ) (b)  $I = 1.0$  KCl ( $\log\beta$  for  $[MH_{-1}] = -3.21$ ,  $[MH_{-2}] = -6.73$ ,  $[M_2H_{-2}] = -4.09$ ,  $[M_3H_{-4}] = -7.58$ ). Hydrolysis constants were taken from Ref. S12.  $\{C_{IOX1} = 161 \mu\text{M}, C_{Fe(III)} = 53 \mu\text{M}\}$

**Table S9.** Conditions applied for steady-state spectrofluorometric measurements.

|                         | $C_{\text{HSA}}$<br>( $\mu\text{M}$ ) | $C_{\text{MARKER}}$<br>( $\mu\text{M}$ ) | $C_{\text{IOX1}}$<br>( $\mu\text{M}$ ) | $\lambda_{\text{EX}}$<br>(nm) | $\lambda_{\text{EM}}$<br>(nm) | slit widths<br>EX/EM (nm/nm) |
|-------------------------|---------------------------------------|------------------------------------------|----------------------------------------|-------------------------------|-------------------------------|------------------------------|
| <b>Trp214 quenching</b> | 1                                     | –                                        | 0–60                                   | 295                           | 310-500                       | 4/4                          |
| <b>WF displacement</b>  | 1                                     | 1                                        | 0–20                                   | 310                           | 320-500                       | 4/4                          |
| <b>DG displacement</b>  | 1                                     | 1                                        | 0–20                                   | 335                           | 420-600                       | 5/5                          |

## CALCULATIONS APPLIED FOR THE EQUILIBRIUM DIALYSIS ASSAYS

Equilibrium dialysis assays were executed according to the following protocol: two parallel samples were always prepared.

**Recovery of the compounds** was determined by dialyzing samples containing the compounds only, and it is defined as follows:

$$\{n_{\text{acceptor equilibrated}} + n_{\text{donor equilibrated}}\} / n_{\text{initial}};$$

where  $n$  = amount of substance. The equilibrium concentrations were determined by measuring the UV-vis absorbance spectrum in the acceptor and donor phases after equilibration and compared to that of the original (initial) sample. The recoveries of IOX1, WF, and DG are: 96%, 99% and 103%, respectively. Although 102% recovery is chemically meaningless, we did not correct the value to 100%. This error is a good indicator of the uncertainty of the method.

In the case of IOX1, it was also possible to determine the recovery of the compound directly in samples containing HSA, as the UV absorption of the compound is not sensitive to HSA binding, so it is sufficient to deconvolute the measured spectrum into the sum of the IOX1 and HSA spectra (see Figure S23a), the recovery of IOX1 in HSA – IOX1 samples was 98%.

**Verifying the equilibration between the two compartments:** according to the principle of equilibrium dialysis, the free compound (comp.) concentration must be the same in the acceptor and donor phases after equilibration ( $[\text{comp.}]_{\text{acceptor}} = [\text{comp.}]_{\text{donor}}$ ). The validity of this condition was verified with samples containing the compounds only. Absorption spectra recorded for the donor and acceptor phases were nearly the same (Figure S23b)

**Equilibrium concentrations listed in Table S2:** In the binary systems, free compound concentration in the acceptor phase ( $[\text{comp.}]_{\text{acceptor}}$ ) was determined on the basis of UV-vis absorption spectra, which is equal to  $[\text{comp.}]_{\text{donor}}$ . In ternary samples, the measured spectrum was deconvoluted to the sum of IOX1 and the site marker spectra (Figure S23c). HSA-bound compound concentrations are calculated as:

$$[\text{comp.}]_{\text{donor}} = (C_{\text{total}} \times V_{\text{donor}} - [\text{comp.}]_{\text{donor}} \times V_{\text{donor}} - [\text{comp.}]_{\text{acceptor}} \times V_{\text{acceptor}}) / V_{\text{donor}}$$

**Free compound fractions:** for this calculation, the equilibrium concentrations determined in the donor phase are considered only, since these concentrations express the strength of interaction with albumin. The formula used is shown in Table S2.

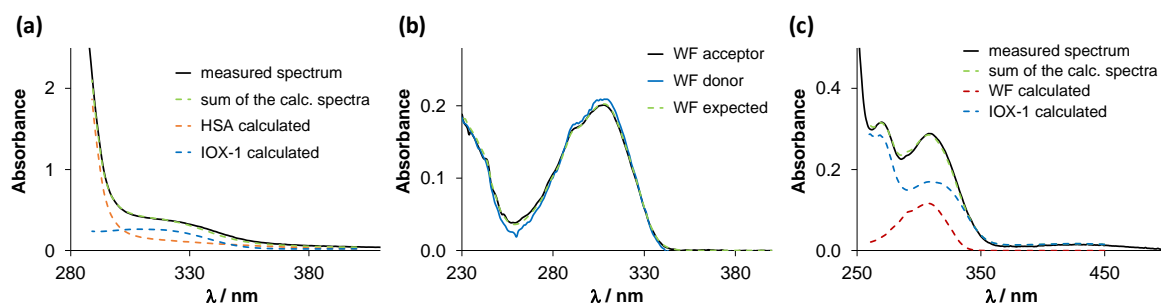

**Figure S23.** (a) Spectral deconvolution of a HSA – IOX1 donor phase sample UV-vis spectrum. (b) UV-vis spectra recorded in the donor and acceptor phases after equilibration of a WF sample; dashed spectrum denotes the “expected” spectrum when the original donor phase WF solution is distributed equivalently between both phases. (c) Spectral deconvolution of a HSA – WF – IOX1 acceptor phase sample spectrum into WF and IOX1 spectra.

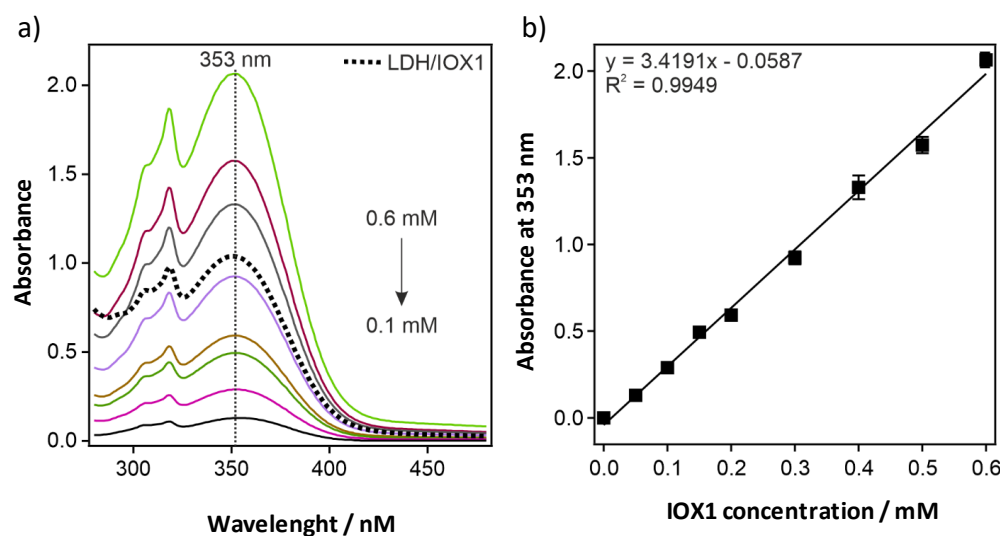

**Figure S24.** (a) UV-vis spectra of IOX1 in the 0.1 – 0.6 mM concentration range and LDH/IOX1 dissolved in HCl. (a) Calibration curve based on the absorbance values measured at 353 nm.

## References

- (S11) J.T. Smith, V.M. Doctor, “Properties of binary complexes between metal ions and glyoxalic or alphaketoglutaric or imidazolypyruvic acid” *J. Inorg. Nucl. Chem.* **1975**, 37, 775.
- (S12) P. L. Brown, C. Ekberg, Hydrolysis of Metal Ions. Wiley, **2016**, pp. 135-145.
